# Supplementary material for: Chiral Resolution, Absolute Configuration Assignment, and Genotoxicity Evaluation of Racemic 3,4-Dihydroquinazoline as a Novel Anticancer Agent
Source: Hindawi journal article supplement (doi:10.1155/2021/6169055), 2021-10-25
Supplement: f1 [file 6169055.f1.pdf]

## [Supplementary Materials]

### Chiral resolution, absolute configuration assignment, and genotoxicity evaluation of racemic 3,4-dihydroquinazoline as a novel anti-cancer agent

Junseong Ahn, Dohyeong Ko, Seyoung Yang, Kwang H. Moon, Jiwon Woo, Ho Yoo, Joohoon Ahn, Jeong H. Lee, Kyung S. Chung, Kyung T. Lee, and Jae Y. Lee

Correspondences should be addressed to Kyung-Tae Lee; ktleee@khu.ac.kr and Jae Y. Lee; ljjy@khu.ac.kr

## [Contents]

**Figure S1.**  $^1\text{H}$  NMR of a mixture of diastereomeric esters **8a** and **8b**.

**Figure S2.**  $^1\text{H}$  NMR of diastereomer (*S*, 4*R*)-**8a**.

**Figure S3.**  $^1\text{H}$  NMR of diastereomer (*S*, 4*S*)-**8b**.

**Figure S4.** Chiral HPLC spectrum and enantiomeric excess (% *ee*) of (–)-**KCP-10043F (OZ001)**.

**Figure S5.** Calculated anisotropic effect of benzene.

**Figure S6.** Ames MPF test results of racemate (±)-**KCP10043F (OZ-001)** and its two enantiomers against *Salmonella typhimurium* TA98

**Figure S7.** Ames MPF test results of racemic (±)-**KCP10043F (OZ-001)** and its two enantiomers against *Salmonella typhimurium* TA100

**Figure S8.** Ames MPF test results of racemic (±)-**KCP10043F (OZ-001)** and its two enantiomers against *Salmonella typhimurium* TA1535

**Figure S9.** Ames MPF test results of racemic (±)-**KCP10043F (OZ-001)** and its two enantiomers against *Salmonella typhimurium* TA1537

**Figure S10.** Ames MPF test results of racemic (±)-**KCP10043F (OZ-001)** and its two enantiomers against *E. coli* WP2 uvrA[pKM101

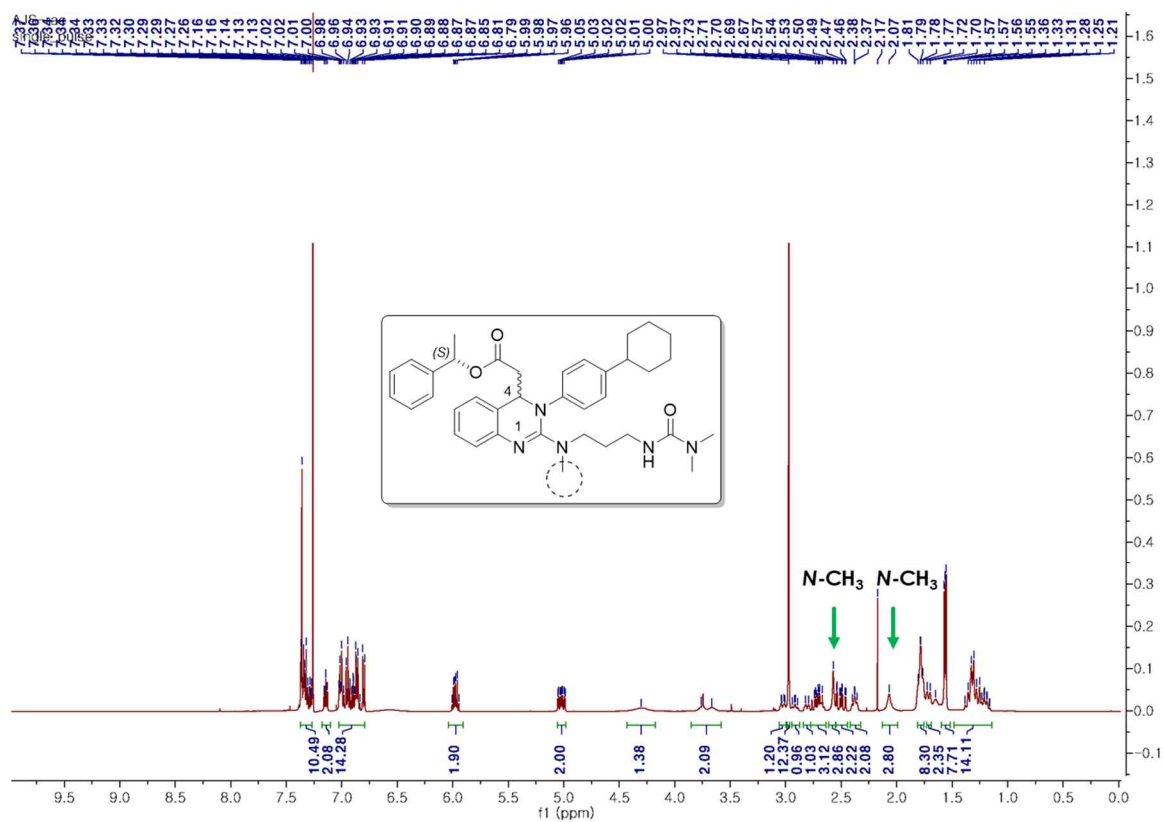

Figure S1. <sup>1</sup>H NMR of a mixture of diastereomeric esters **8a** and **8b**.

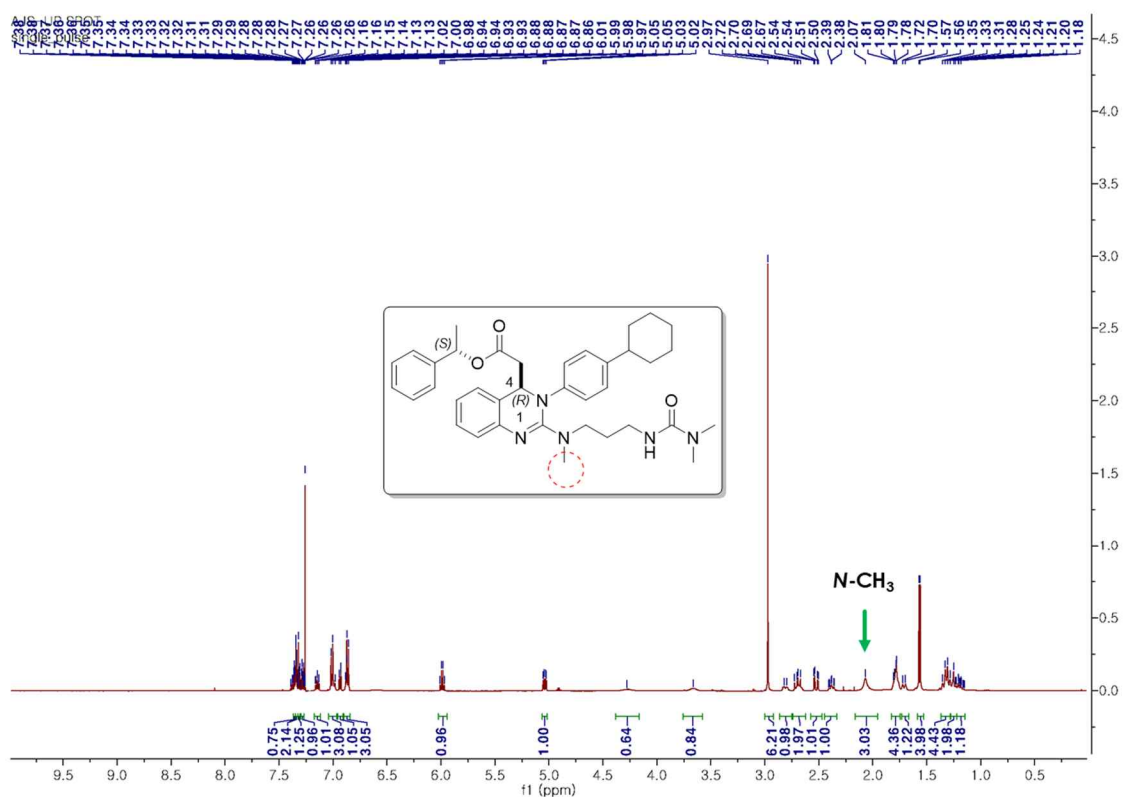

Figure S2. <sup>1</sup>H NMR of diastereomer (*S*, 4*R*)-**8a**.

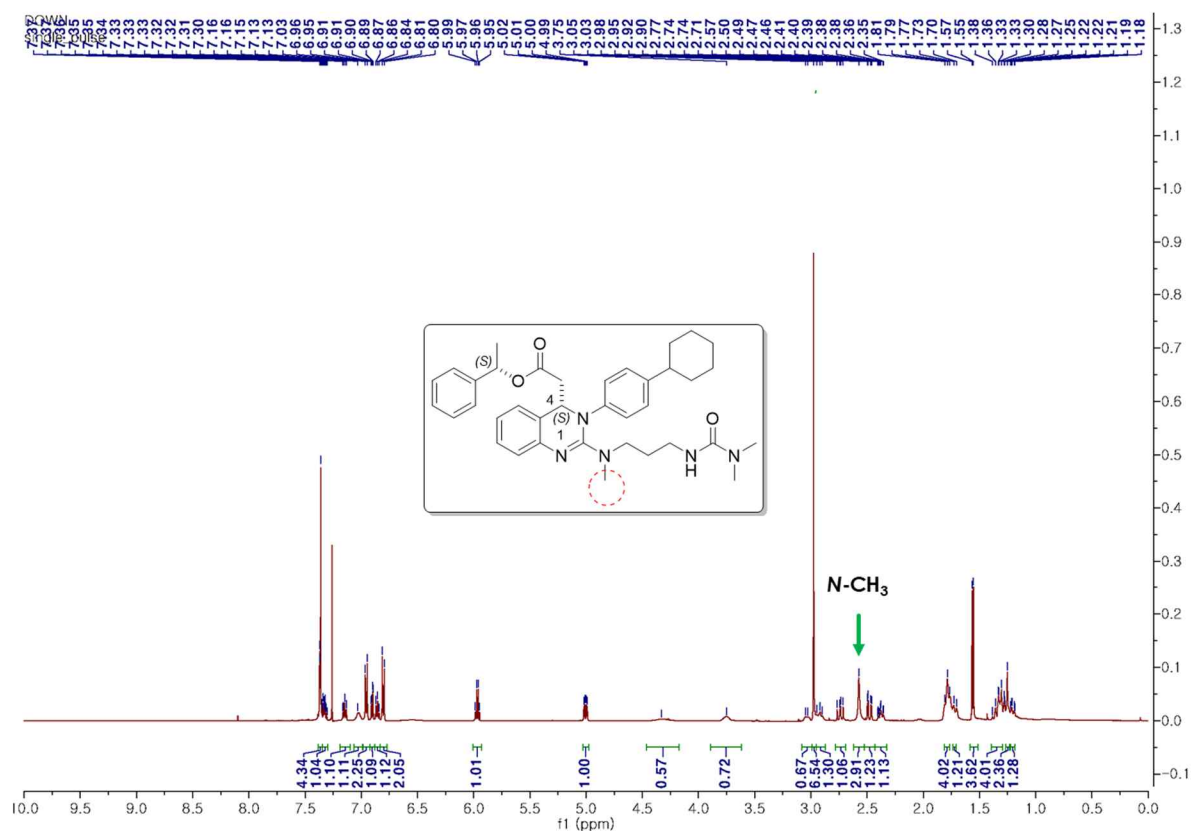

**Figure S3.**  $^1\text{H}$  NMR of diastereomer (*S*, 4*S*)-**8b**.

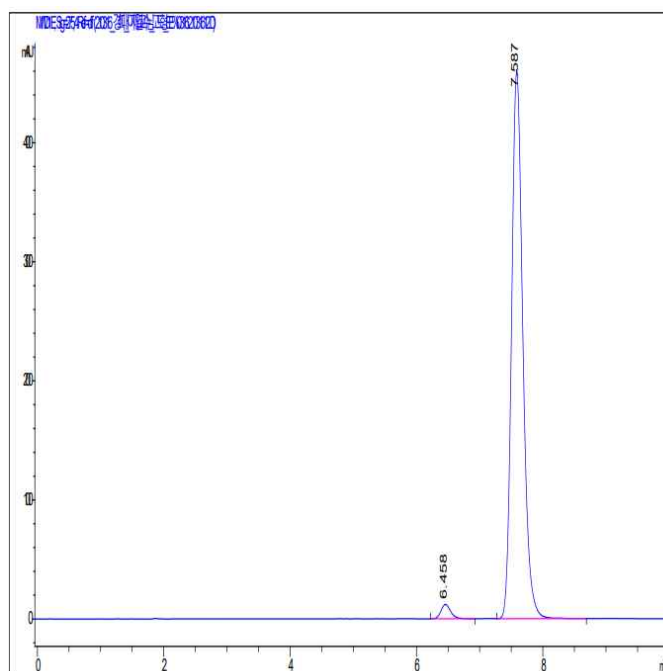

| NO       | AREA    |         | % EE  |
|----------|---------|---------|-------|
|          | 6.5 min | 7.6 min |       |
| 1        | 129     | 5679.1  | 95.56 |
| 2        | 133.4   | 5891.3  | 95.57 |
| 3        | 134.2   | 5883.4  | 95.54 |
| 4        | 131.1   | 5795.9  | 95.58 |
| 5        | 133.3   | 5848.7  | 95.54 |
| 6        | 134.6   | 5947.7  | 95.57 |
| 7        | 133.9   | 5945.9  | 95.60 |
| 8        | 134.9   | 5959    | 95.57 |
| Averager | 133.05  | 5868.88 | 95.57 |
| STDEV    | 2.01    | 94.66   | 0.02  |
| %RSD     | 1.51    | 1.61    | 0.02  |

**Figure S4.** Chiral HPLC spectrum and enantiomeric excess (% ee) of (*R*)-(-)-**KCP-10043F (OZ001)**: Column: Chiralcel IE-3 (4.6 x 150), mobile phase: diethylamine/hexane/EtOH = 0.1/ 80 / 20.

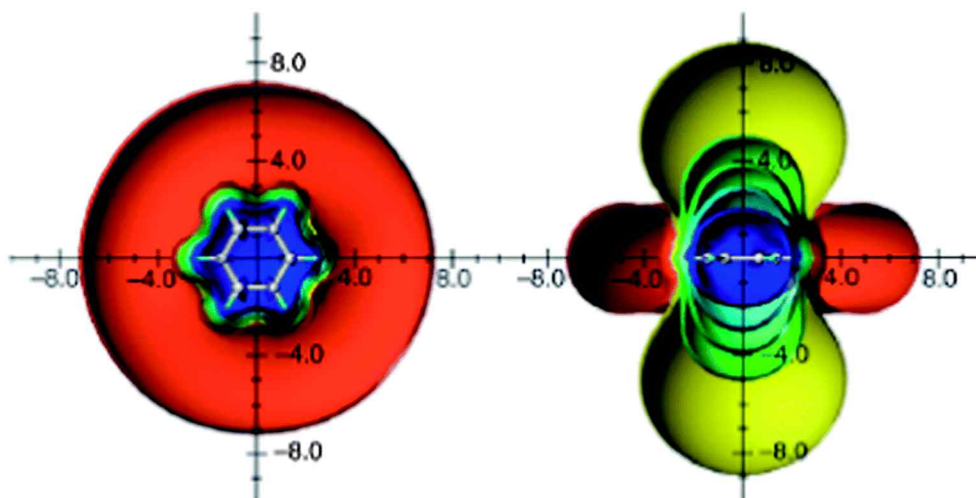

**Figure S5.** Calculated anisotropic effect of benzene (shielding surfaces at 0.1 ppm in yellow, at 0.5 ppm in green, at 1 ppm in green-blue, at 2 ppm in cyan, and 5 ppm in blue, respectively; deshielding surface at 0.1 ppm in red). View from perpendicular to the molecule and in the plane of the molecule. Reproduced from Klod, S.; Kleinpeter, E. *J. Chem. Soc. Perkin Trans.*, **2001**, 2, 1893.

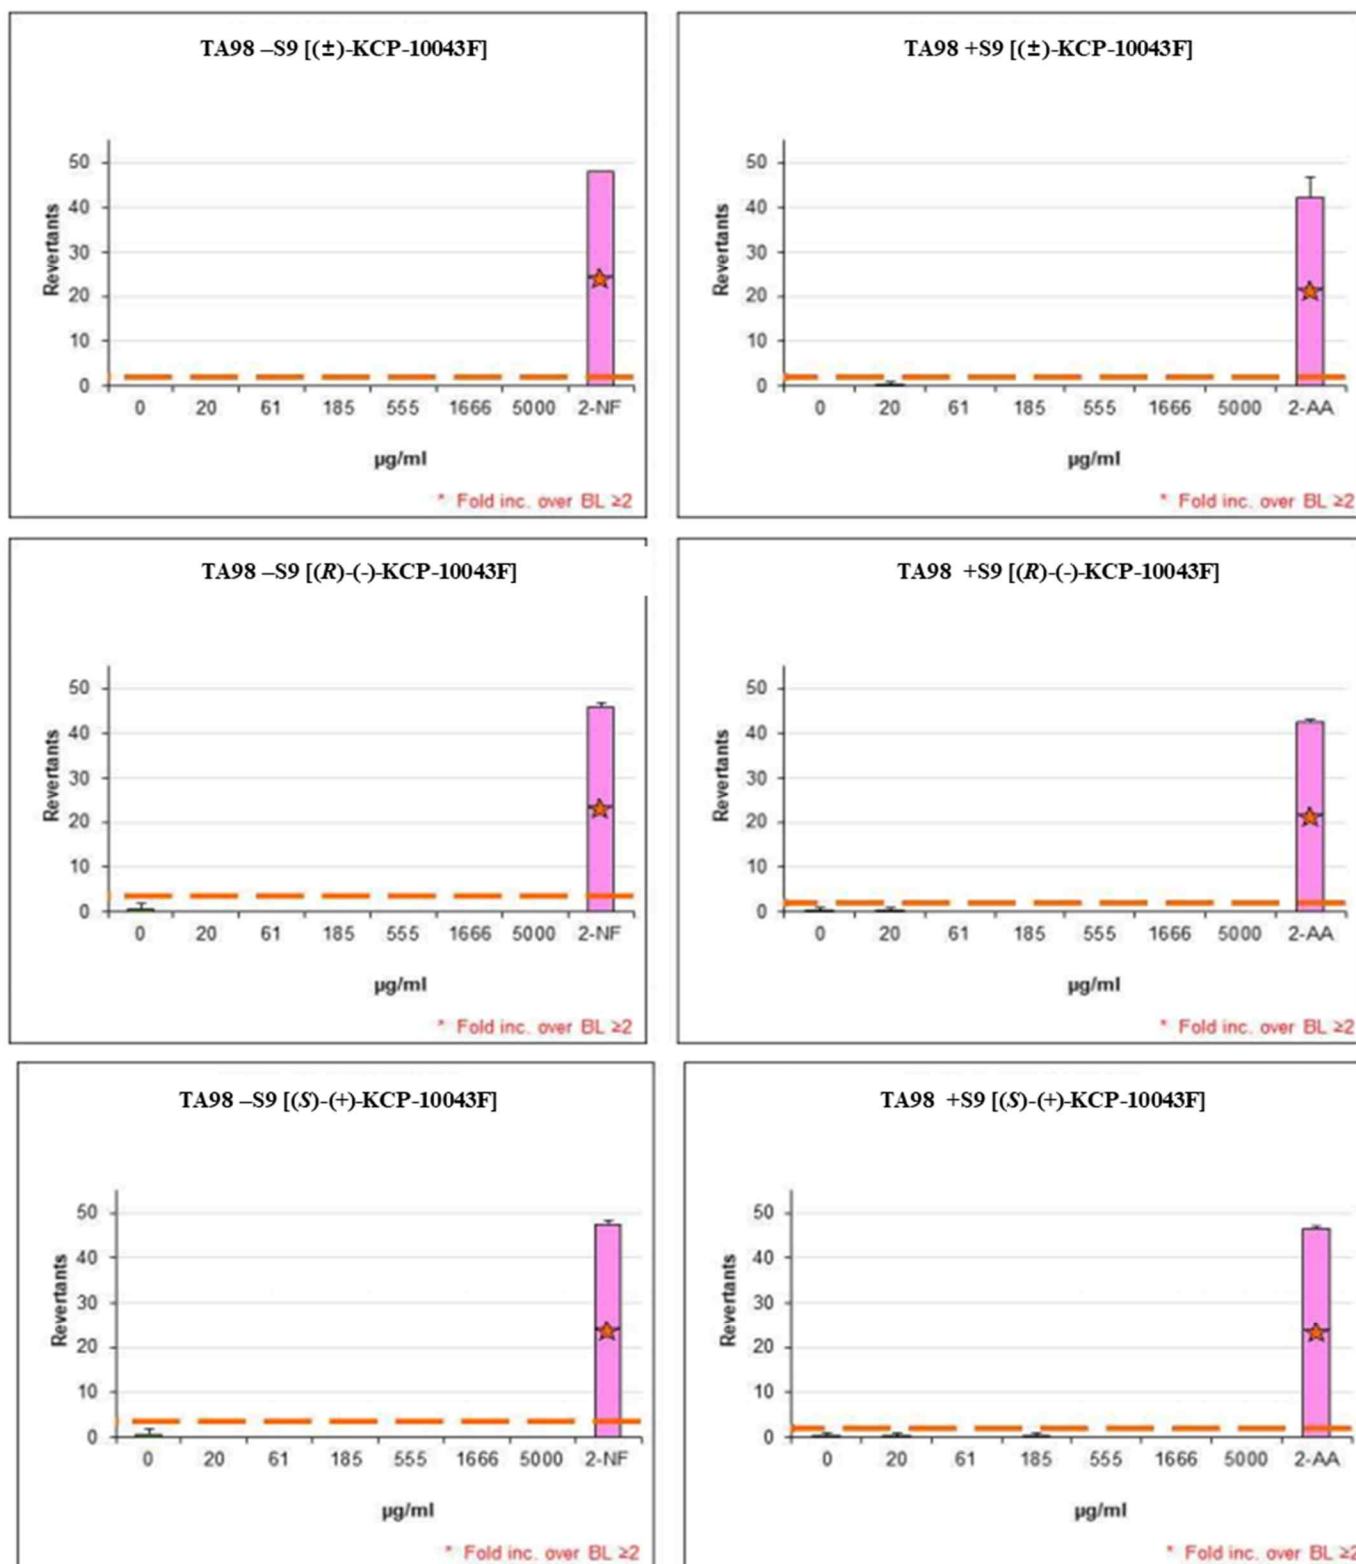

**Figure S6.** Ames MPF test results of racemate (±)-KCP10043F (OZ-001) and its two enantiomers against *Salmonella typhimurium* TA98 with/without rat liver S9 fraction. 2-Nitrofluorene (2-NF, 2 µg/mL) and 2-aminoacridine (2-AA; 0.5 µg/mL) were used as positive controls (mutagens) and DMSO (solvent) was used as a negative control.

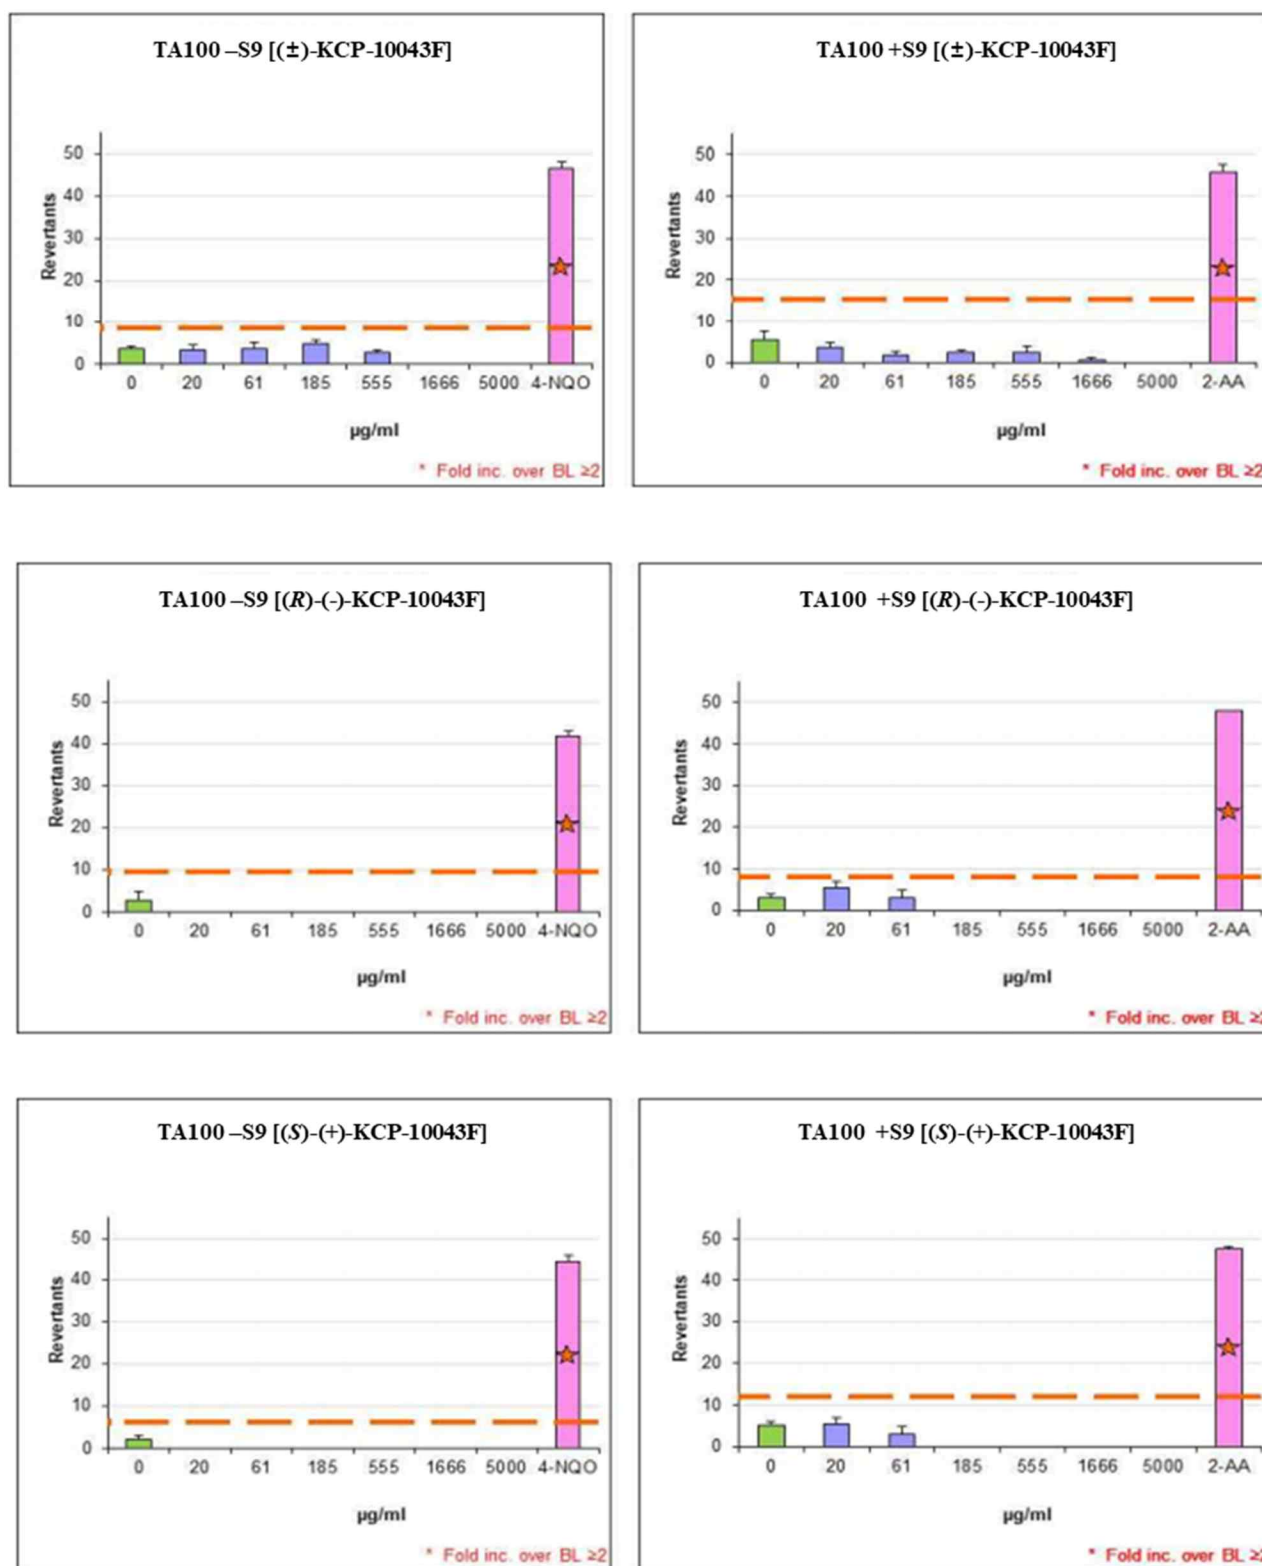

**Figure S7.** Ames MPF test results of racemic (±)-KCP10043F (OZ-001) and its two enantiomers against *Salmonella typhimurium* TA100 with/without rat liver S9 fraction. 4-Nitroquinoline-*N*-oxide (4-NQO, 0.1 µg/mL) and 2-aminoacridine (2-AA, 1.25 µg/mL) were used as positive controls (mutagens) and DMSO (solvent) was used as a negative control.

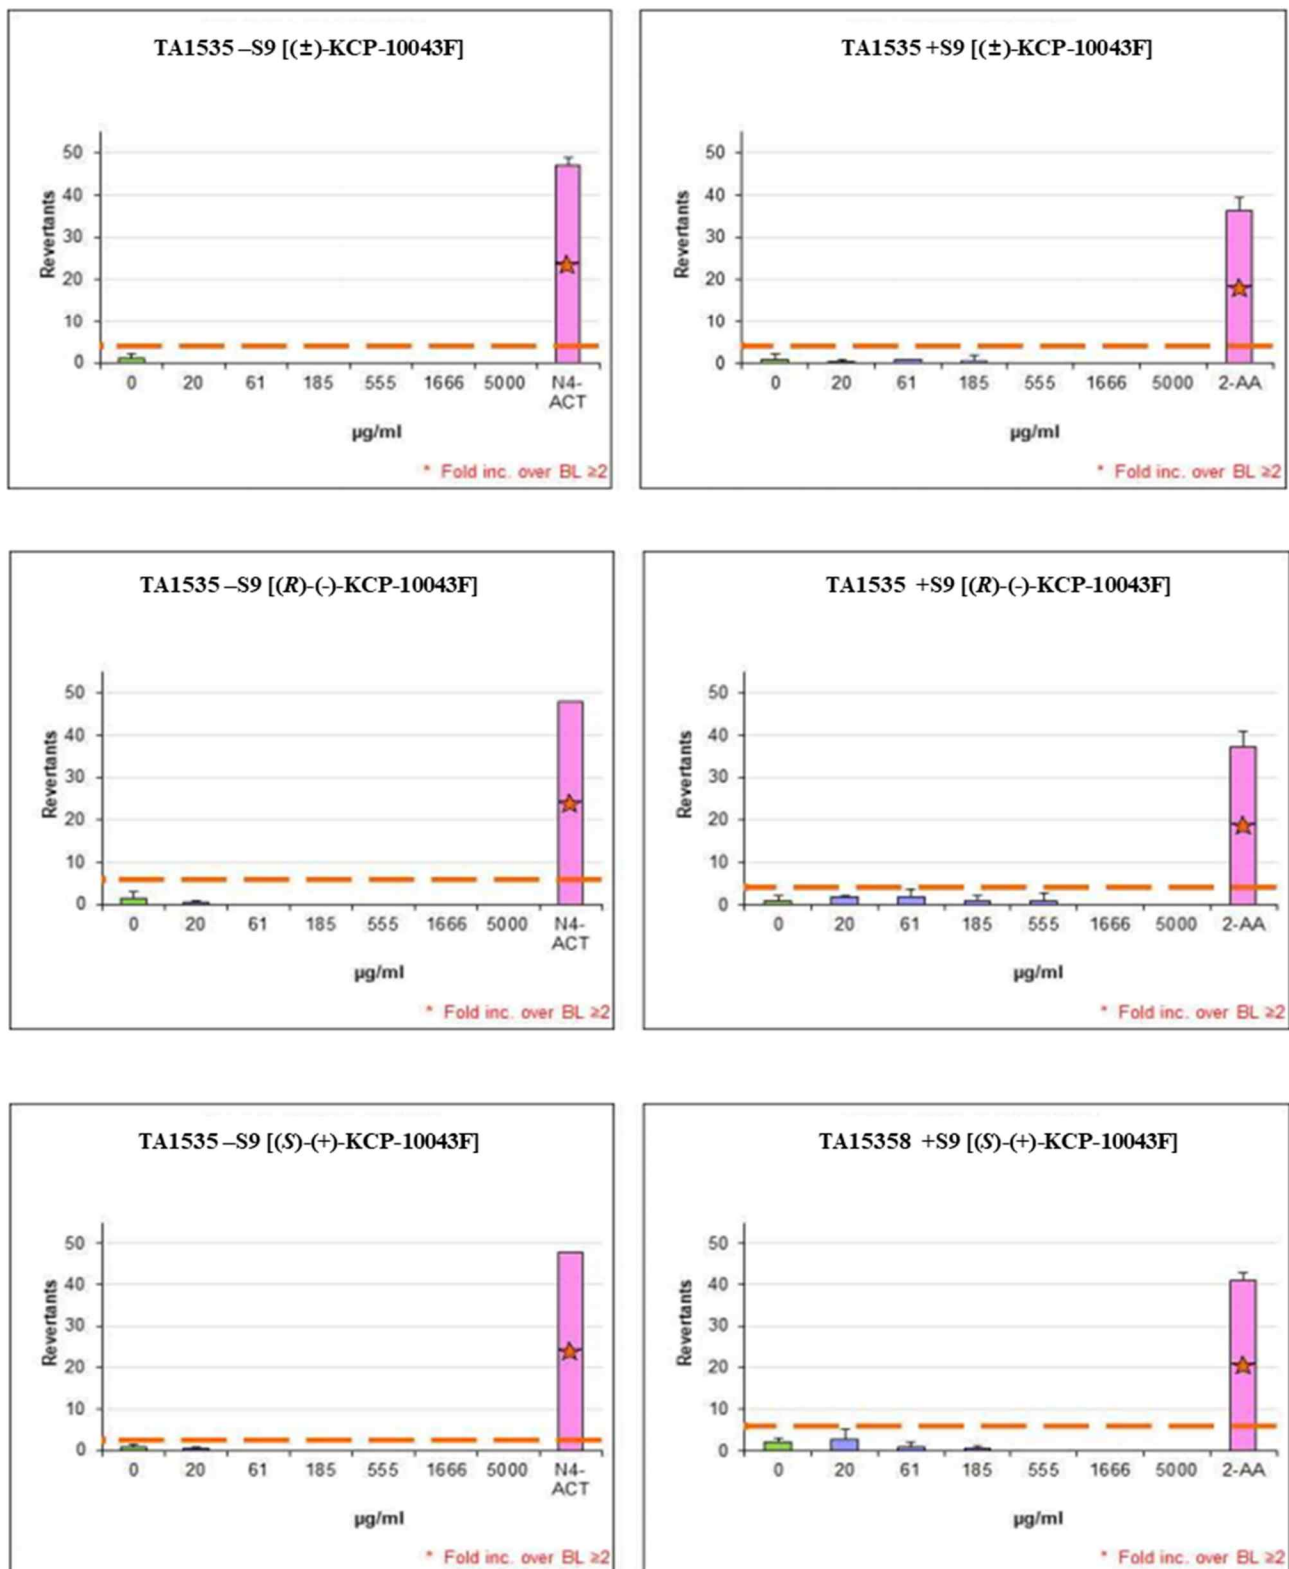

**Figure S8.** Ames MPF test results of racemic (±)-KCP10043F (OZ-001) and its two enantiomers against *Salmonella typhimurium* TA1535 with/without rat liver S9 fraction. N4-Aminocytidine (N4-ACT, 100 µg/mL) and 2-aminoacridine (2-AA, 2.5 µg/mL) were used as positive controls (mutagens) and DMSO (solvent) was used as a negative control.

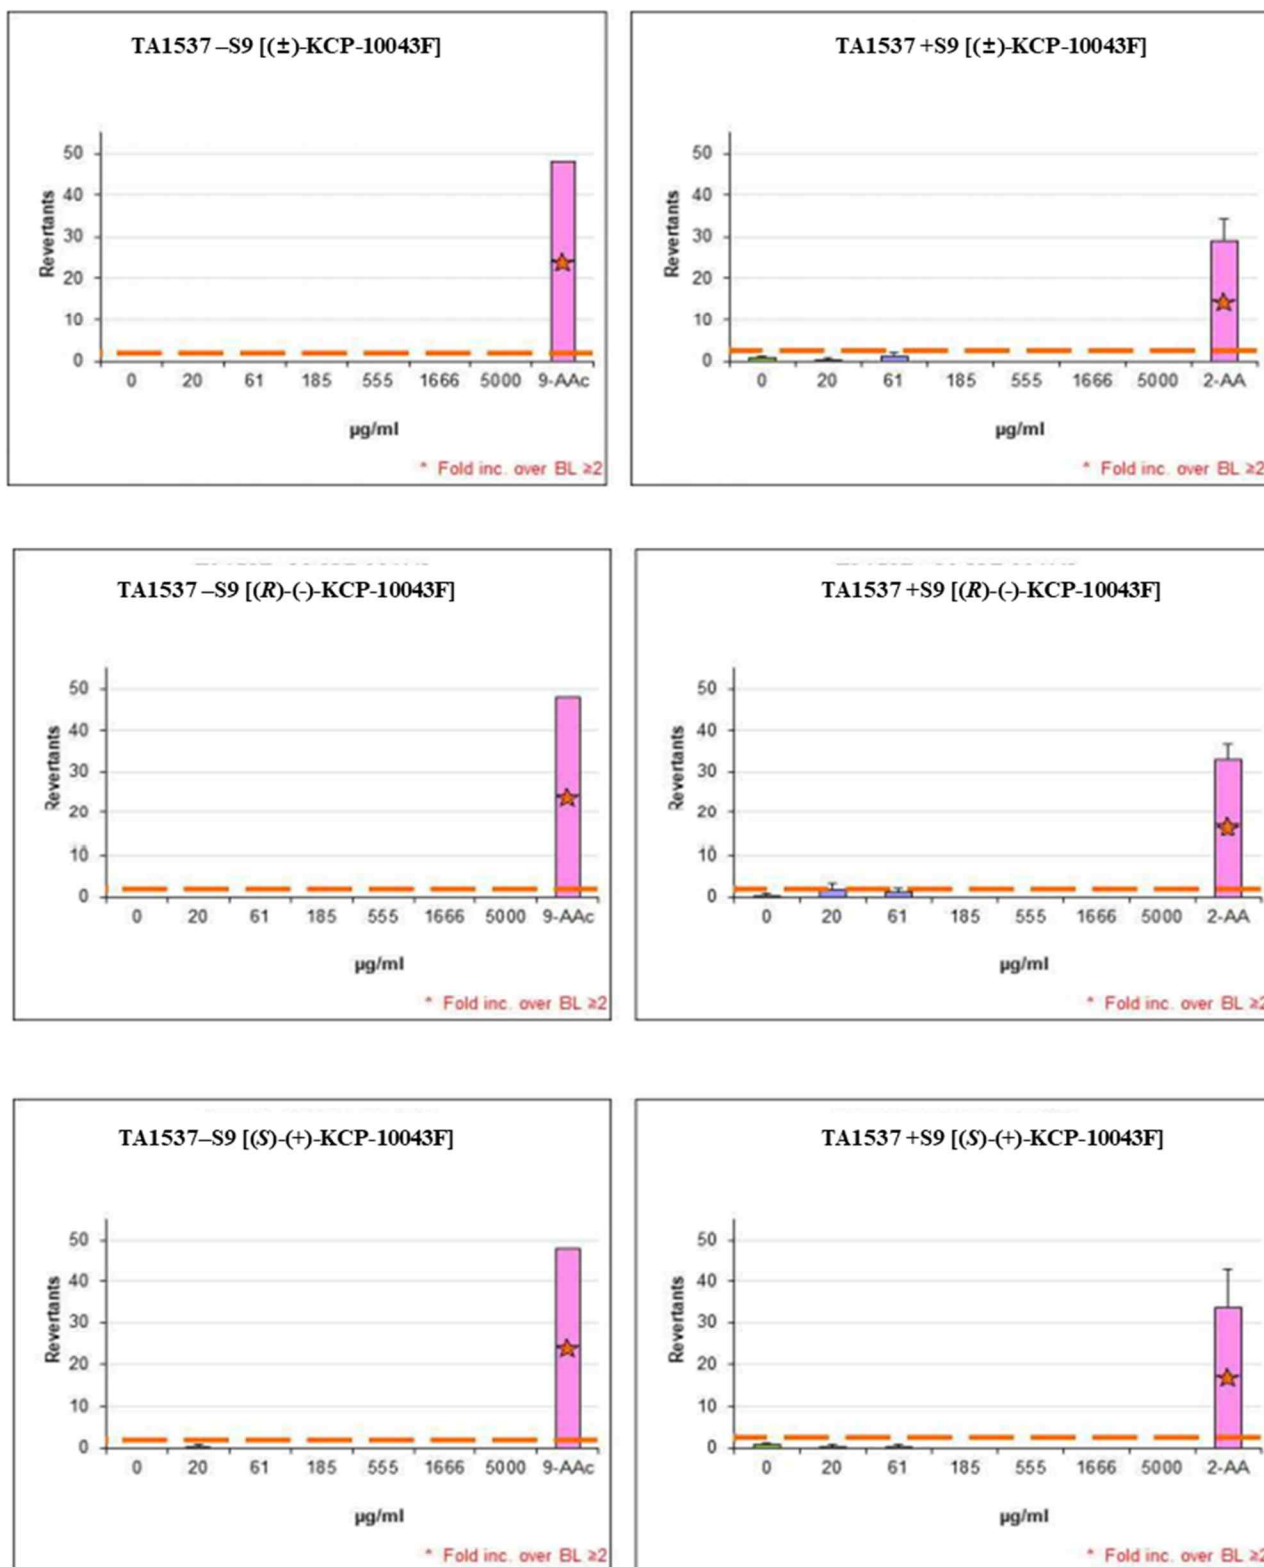

**Figure S9.** Ames MPF test results of racemic (±)-KCP10043F (OZ-001) and its two enantiomers against *Salmonella typhimurium* TA1537 with/without rat liver S9 fraction. 9-Aminoacridine (9-AAC, 15 µg/mL) and 2-aminoacridine (2-AA, 2.5 µg/mL) were used as positive controls (mutagens) and DMSO (solvent) was used as a negative control.



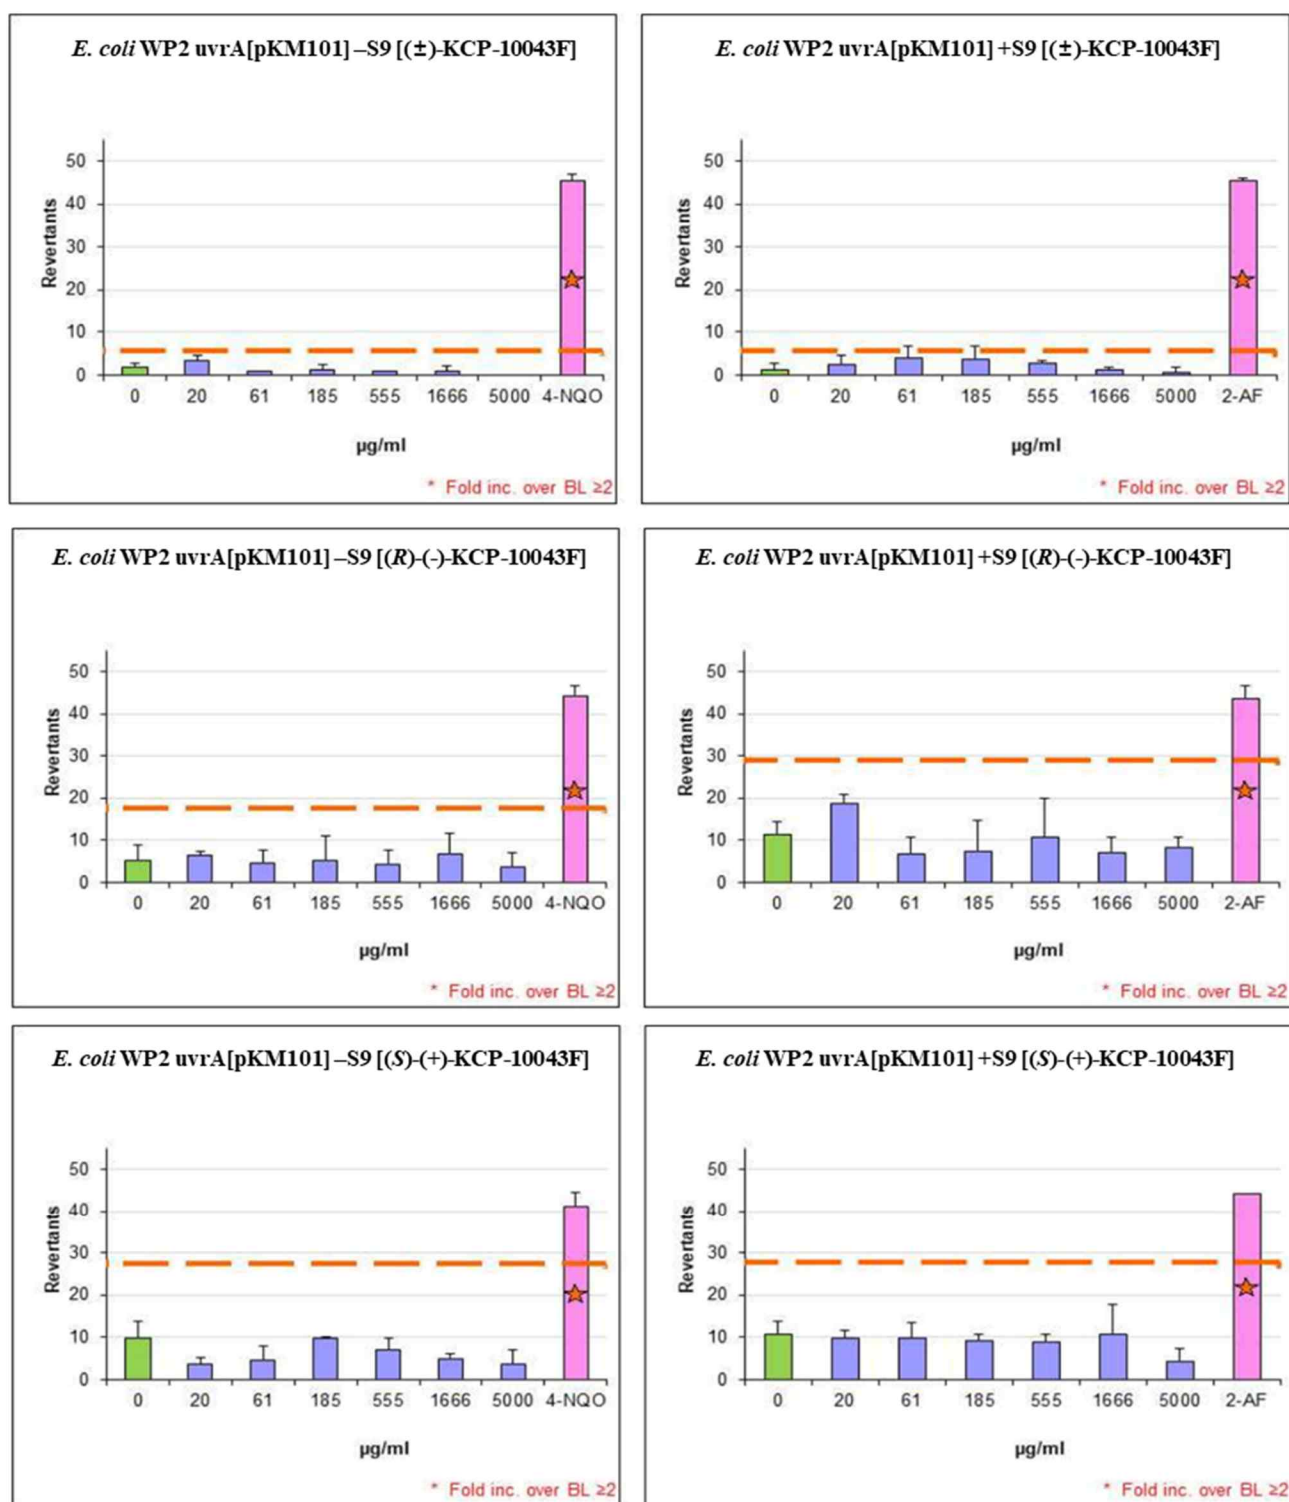

**Figure S10.** Ames MPF test results of racemic (±)-KCP10043F (OZ-001) and its two enantiomers against *E. coli* WP2 uvrA[pKM101] with/without rat liver S9 fraction. 4-Nitroquinoline-*N*-oxide (4-NQO, 2.0 µg/mL) and 2-aminofluorene (2-AF, 400 µg/mL) were used as positive controls (mutagens) and DMSO (solvent) was used as a negative control.

-EOD-
